# Supplementary material
Source: Springer Nature journal article supplement (https://www.springermedizin.de/resource/supplementary/13019_2014_1466_MOESM1_ESM.pdf/9640758)
Supplement: MOESM1 [file 9640758]

**94 patients undergoing surgery**

```
graph TD; A[94 patients undergoing surgery] --> B[Total = 60 patients]; A --> C[Exclusions (34 patients)]; C --> D["- Discharge before the 6MWT (N=13)  
- Time of MV greater than 24 (N=5)  
- Hemodynamic instability (N=1)  
- Excluded the WIC (N=8)  
- Need for reoperation (N=4)  
- Death during surgery or immediate postoperative period (N=3)"]; style C fill:none,stroke:none;
```

Exclusions (34 patients)

- Discharge before the 6MWT (N=13)
- Time of MV greater than 24 (N=5)
- Hemodynamic instability (N=1)
- Excluded the WIC (N=8)
- Need for reoperation (N=4)
- Death during surgery or immediate postoperative period (N=3)

**Total = 60 patients**
